# Supplementary material for: Crude Extracts of Talaromyces Strains (Ascomycota) Affect Honey Bee (Apis mellifera) Resistance to Chronic Bee Paralysis Virus
Source: Viruses. 2023 Jan 25;15(2):343. doi: 10.3390/v15020343 (PMC9958978; doi:10.3390/v15020343)
Supplement: Supplementary file 1 [file viruses-15-00343-s001.zip › viruses-2176098-supplementary (2)/Supplementary data_annotation.xlsx]

## Sheet: Sheet1
Talaromyces sp. specific compounds
Trivial name	CHEMISTRY.FORMULA	Talaromyces strains
Alternariol monomethylether	C15H12O5
Azaphilone Mult. A	C24H26O6
Azaphilone Mult. B	C24H24O6
Azaphilone Mult. C	C24H22O6
Azaphilone Mult. D	C24H26O7
Berkelic acid	C29H40O9
Catenarin	C15H10O6
Chrysophanol	C15H10O4
Citreoviridin	C23H30O6
Dipicolinic acid	C7H5NO4
Duclauxin	C29H22O11
Emodin	C15H10O5
Erytroglaucin	C16H12O6
Flavoglaucin	C19H28O3
Glauconic acid	C18H20O7
Helminthosporin	C15H10O5
Islandicin	C15H10O5
Luteoskyrin	C30H22O12
Mitorubrin	C21H18O7
Mitorubrinic acid	C21H16O9
Mitorubrinol	C21H18O8
Mitorubrinol acetate	C23H20O9
Monascin	C21H26O5
Monorden	C18H17ClO6
Naphthalic anhydride	C12H6O3
Purpactin A	C23H26O7
Purpactin B	C23H26O7
Purpactin C	C23H24O7
Purpurogenone	C14H12O5
Rubratoxin A	C26H32O11	B11, B30, B49, B69, B195
Rubratoxin B	C26H30O11	B11, B30, B49, B69, B195
Rubropunctatin	C21H22O5
Rugulosin	C30H22O10
Rugulovasine A	C16H16N2O2
Rugulovasine B	C16H16N2O2
Secalonic acid D	C32H30O14
Skyrin	C30H18O10
Stipitatic acid	C8H6O5
Talaromyolide D	C25H34O5
Vanitaracine A	C25H34O7
Vermicelline
Vermiculine	C20H24O8
Vermixocin A	C21H24O6
Vermixocin B	C23H26O7
Wortmannin	C23H24O8
Funiculosone	C15H14O6
Ravenelin	C14H10O5
Mangrovamide J	C15H16O6
Chrodrimanin F	C25H34O6
